# Supplementary material for: ZFT is the major iron and zinc transporter in Toxoplasma gondii
Source: eLife journal article supplement (doi:10.7554/elife.108666), 2025-10-03
Supplement: fig1-data1 [file Figure 1_Source Data 1.pdf › Figure 1 - Source Data 1. PDF file containing original western blots for Figure 1D, indicating the relevant bands and conditions/Figure 1_Source Data 1.pdf]

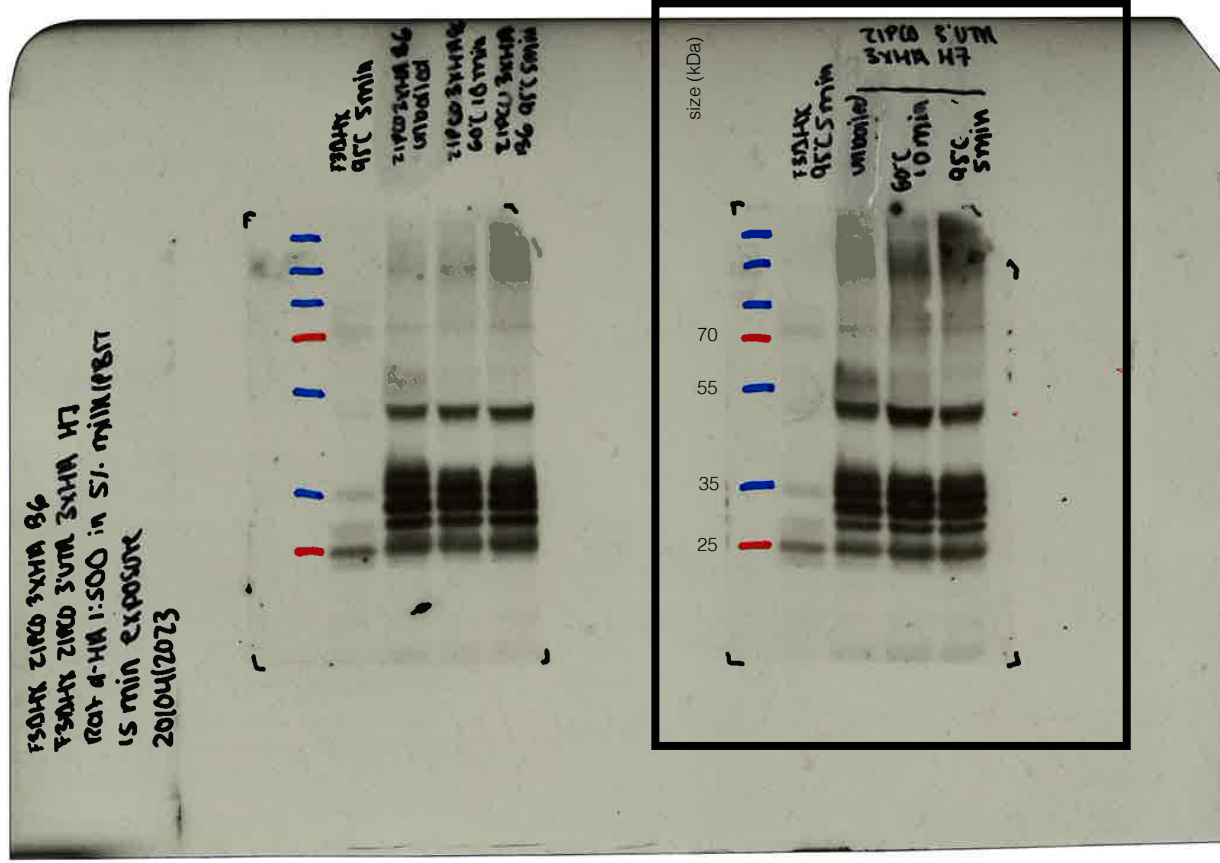

ZIPCO here is referring to ZFT, and the unboiled and 95°C labels are swapped on this membrane.

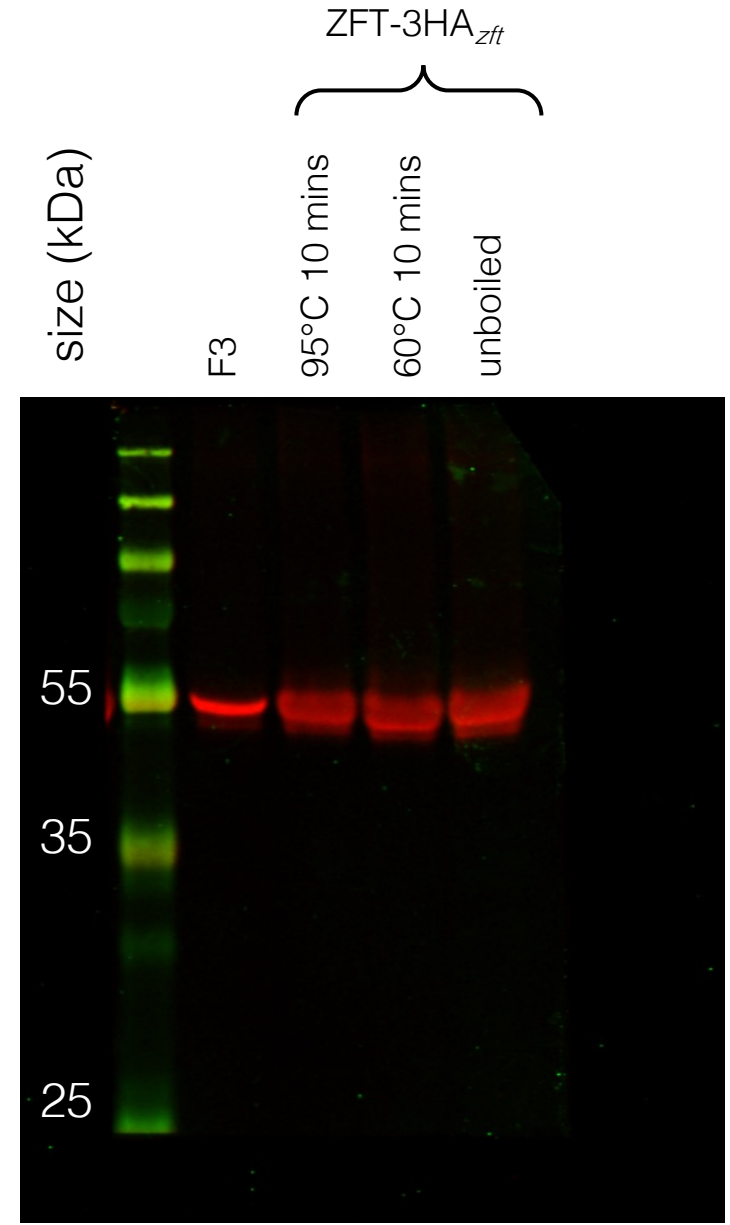

Figure 1, Source Data 1. Original membranes corresponding to Figure 1, panel D.
