# Supplementary figures and images for: ZFT is the major iron and zinc transporter in Toxoplasma gondii
Source: eLife journal article supplement (doi:10.7554/elife.108666), 2025-10-03

2A

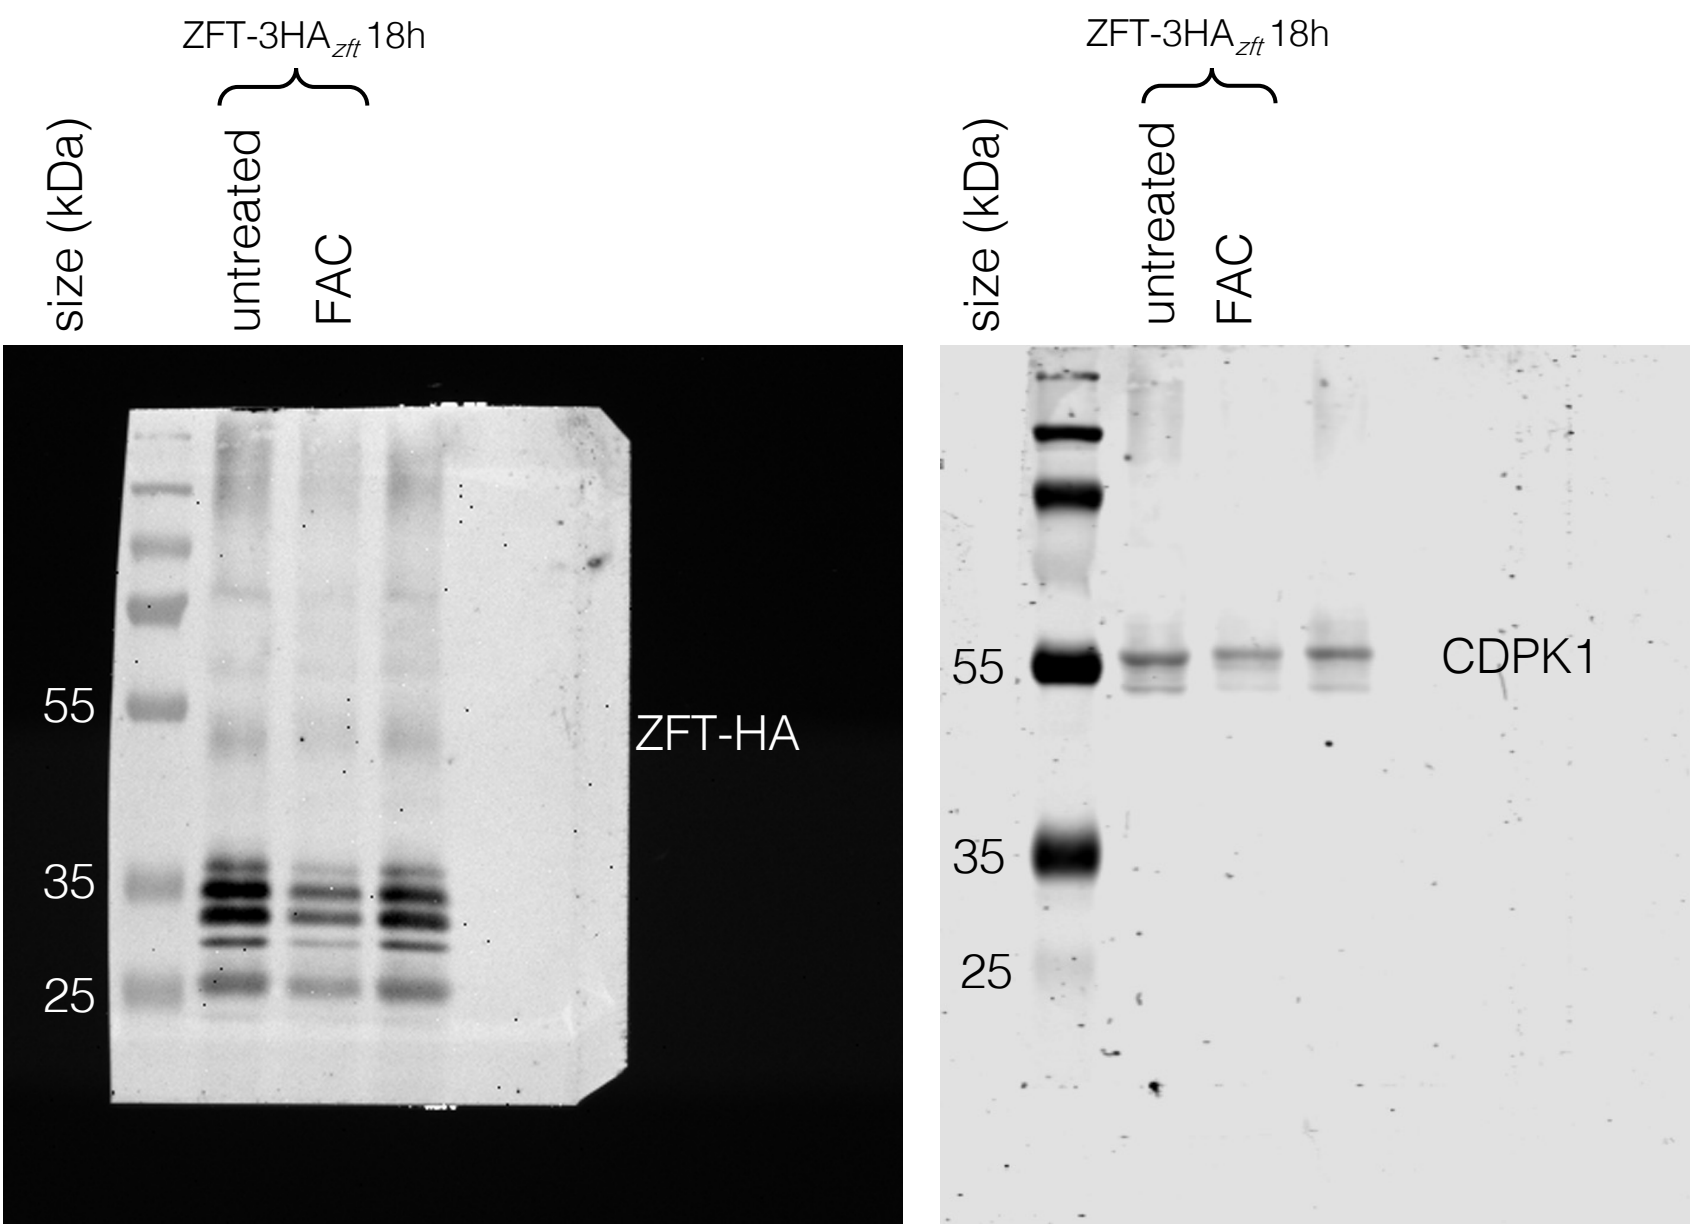

2C

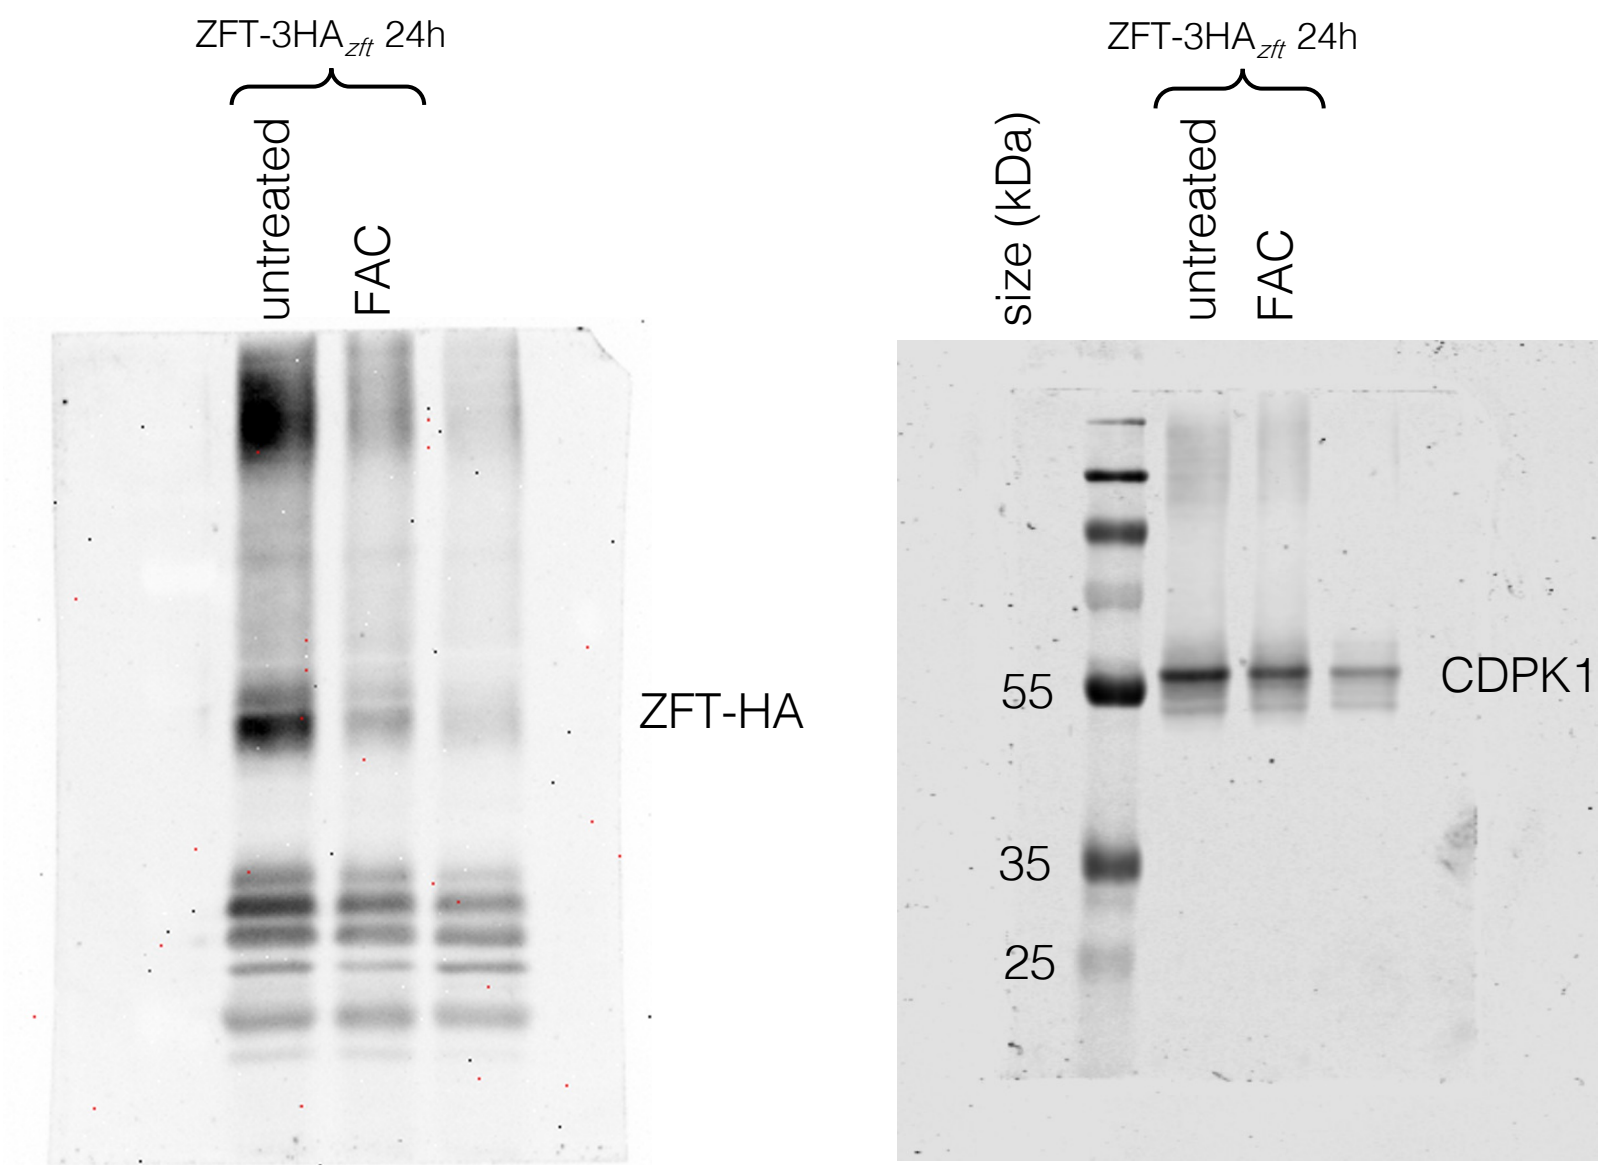

2H

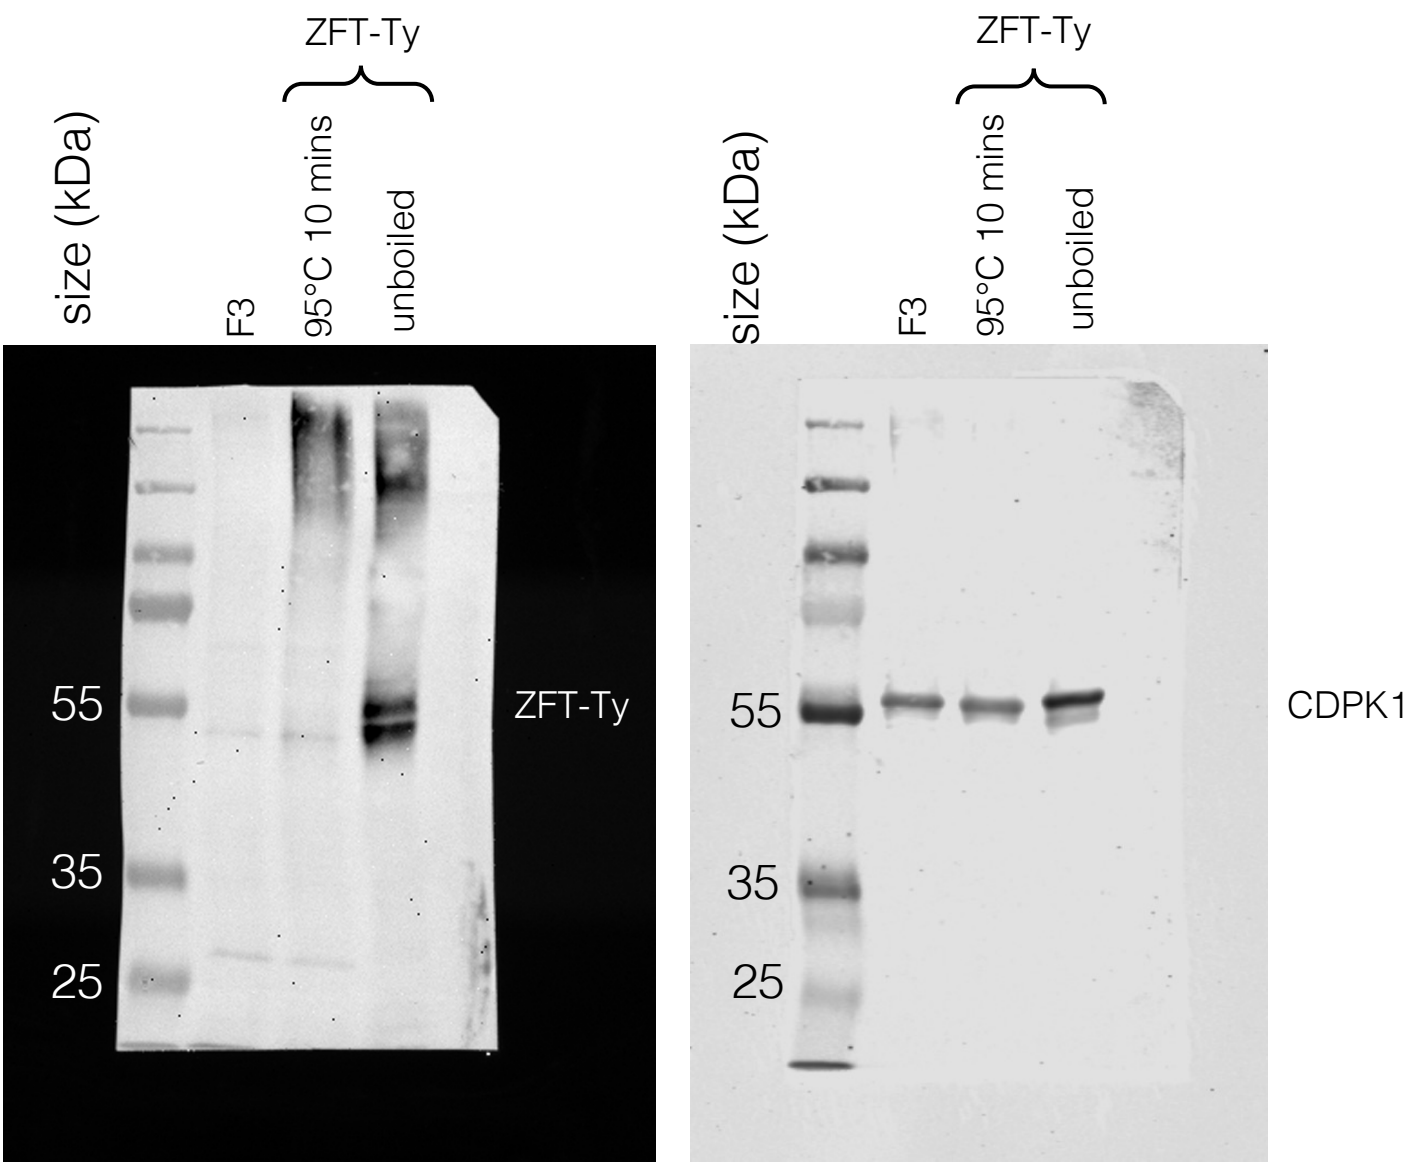

Figure 2, Source Data 1. Original membranes corresponding to Figure 2, panels A, C and H.

Supplement: fig2-data1 [file Figure 2_Source Data 1.pdf › Figure 2 - Source Data 1. PDF file containing original western blots for Figures 2A,2C and 2H indicating the relevant bands and conditions/Figure 2_Source Data 1.pdf]

3E

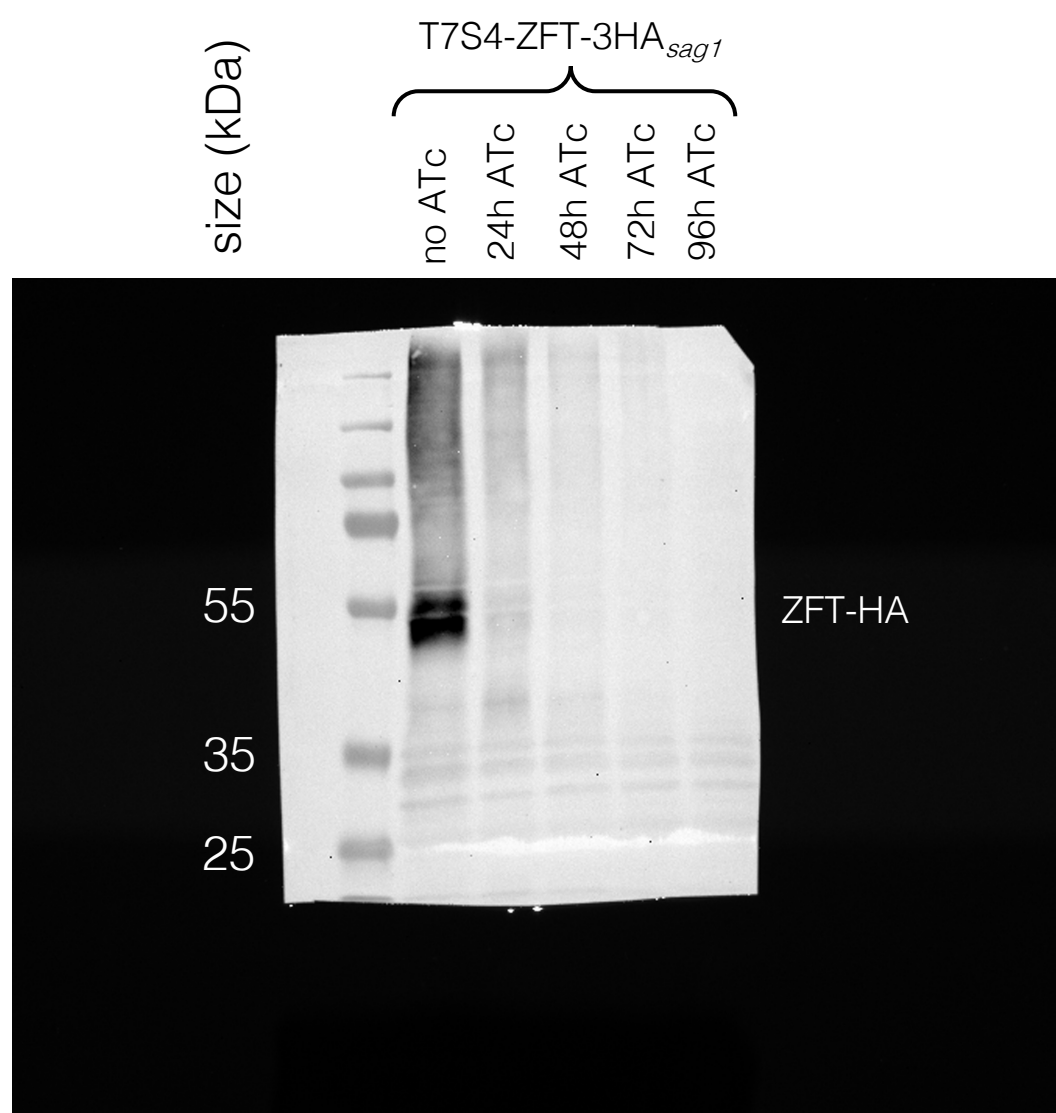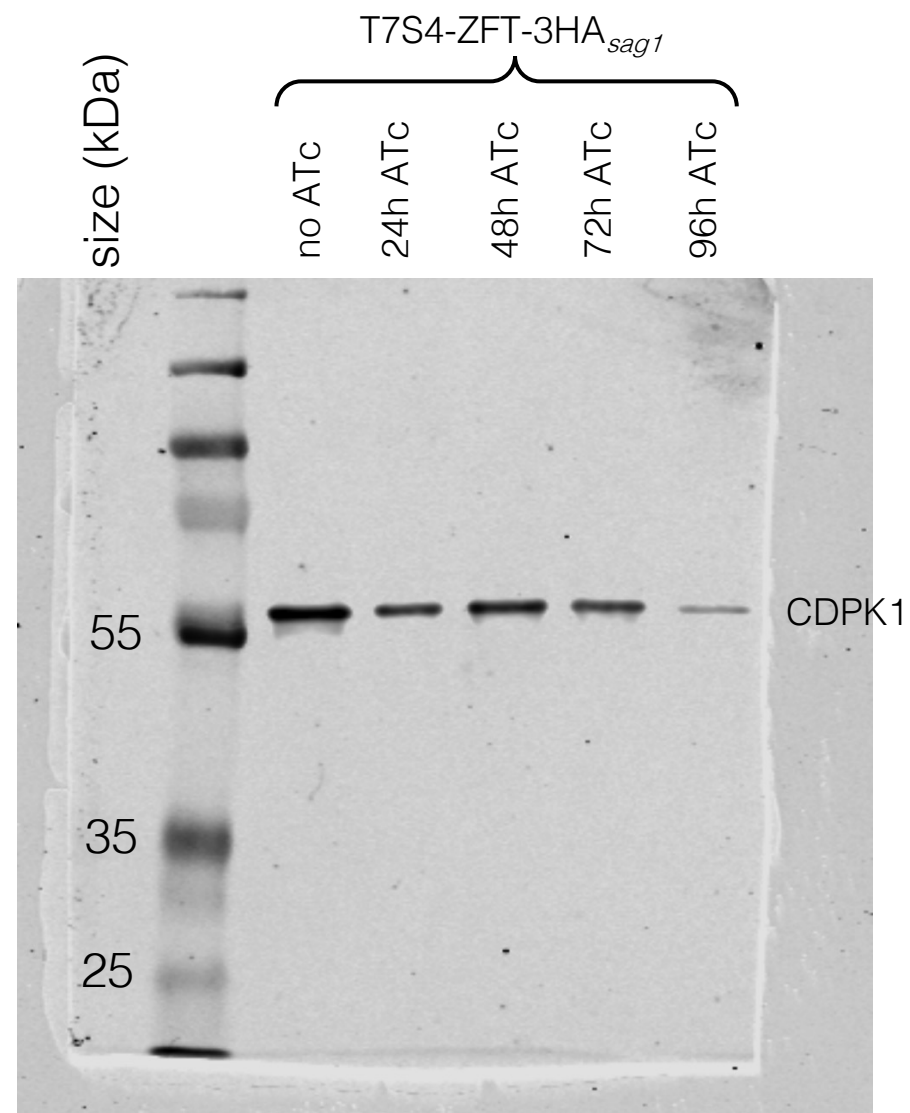

3G

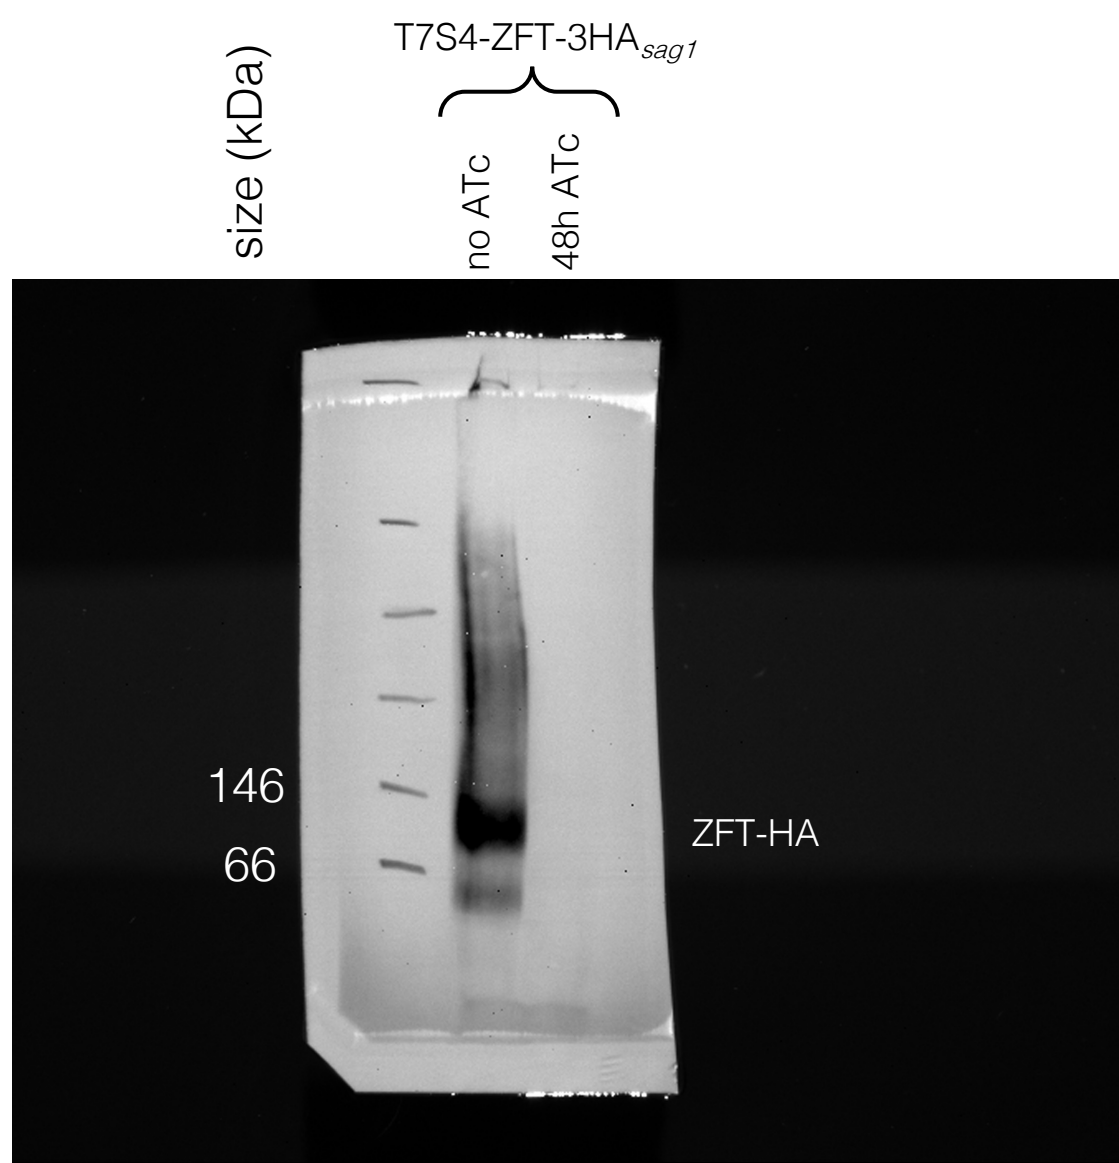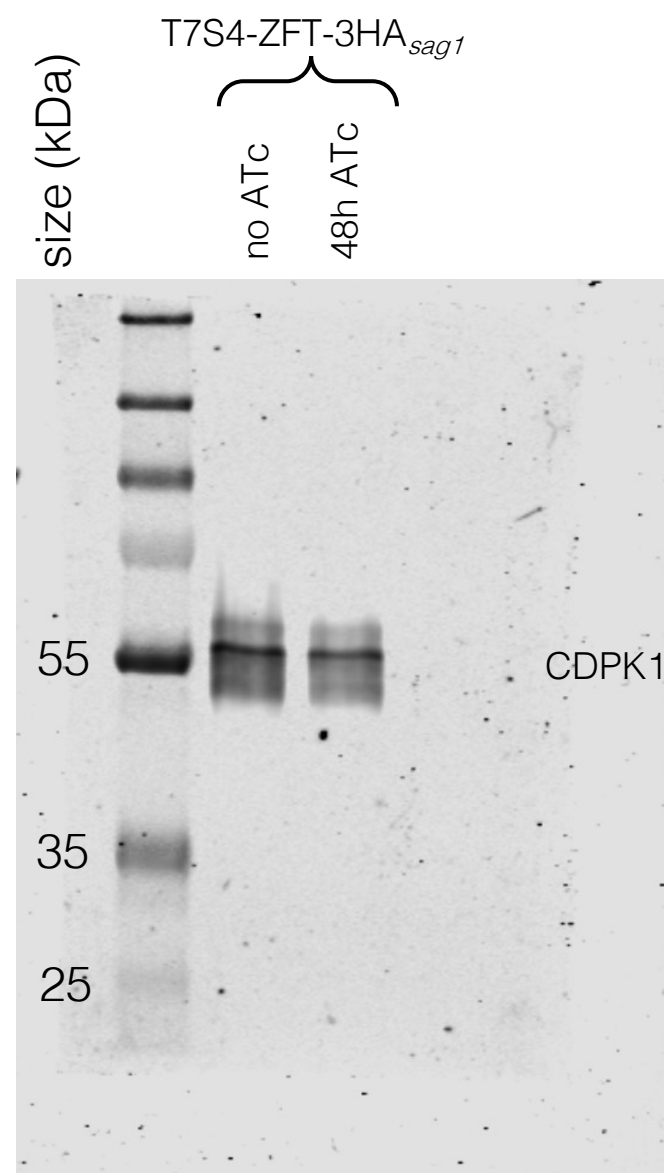

Figure 3, Source Data 1. Original membranes corresponding to Figure 3, panels E and G.

Supplement: fig3-data1 [file Figure 3_Source Data 1.pdf › Figure 3 - Source Data 1. PDF file containing original western blots for Figures 3E and 3G, indicating the relevant bands and conditions/Figure 3_Source Data 1.pdf]

3C

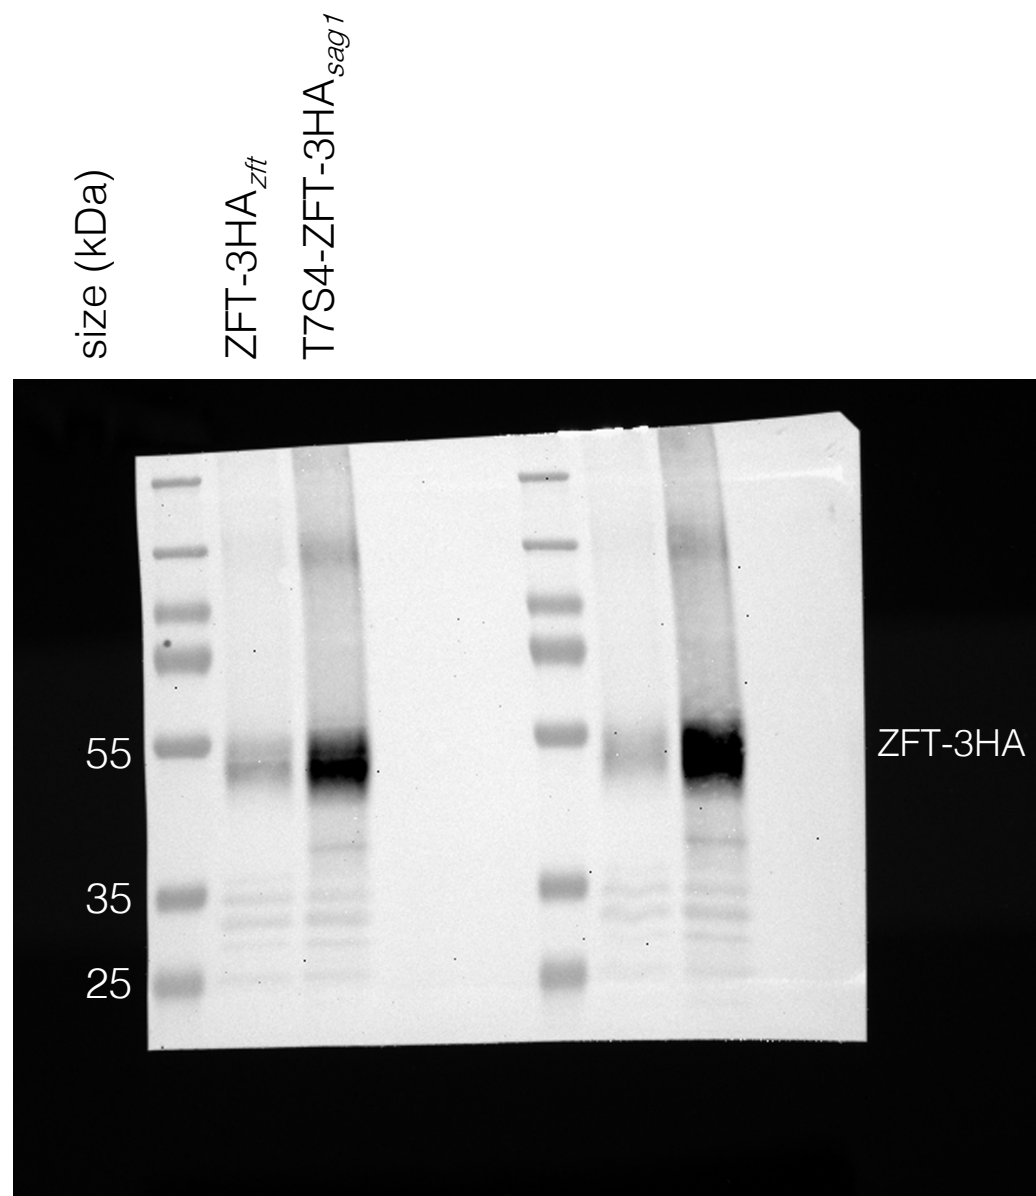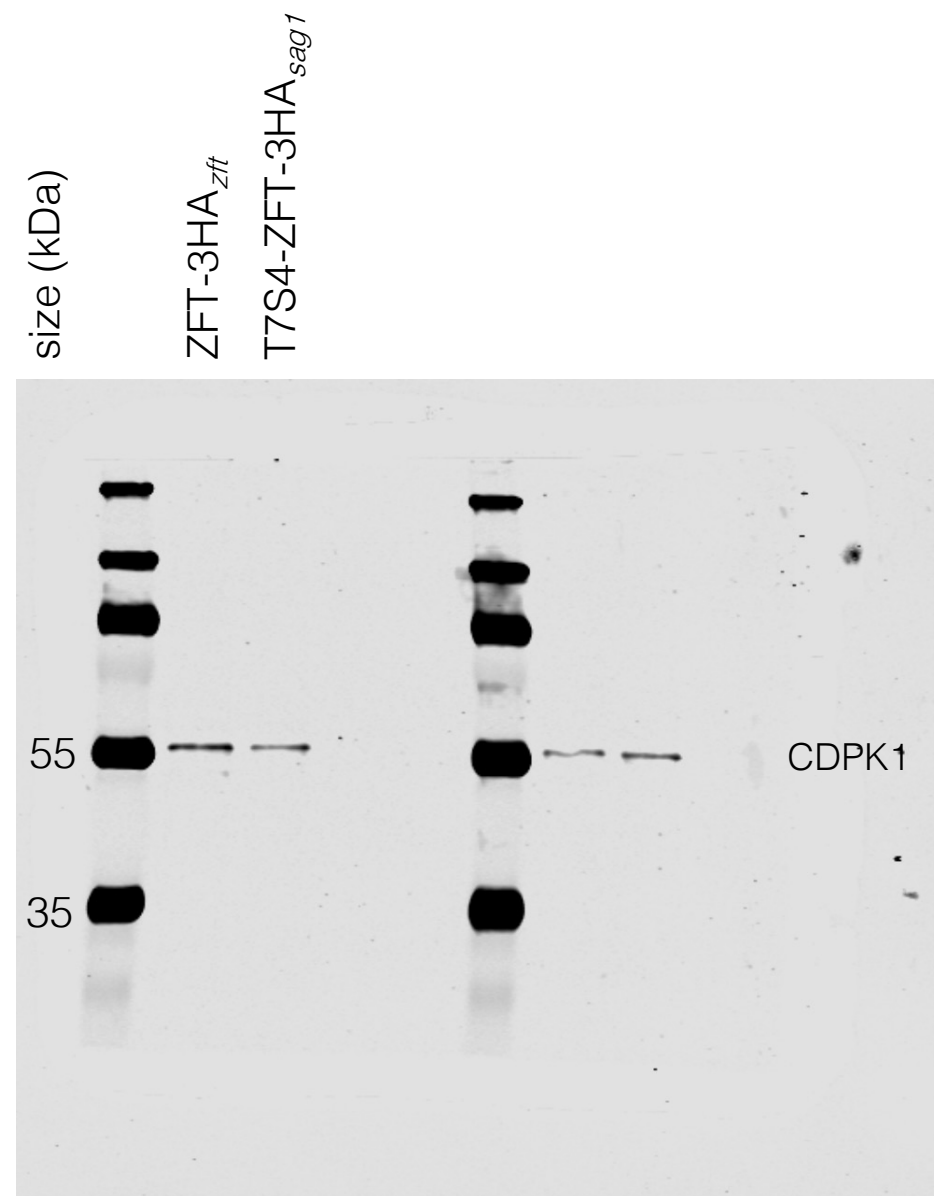

3E

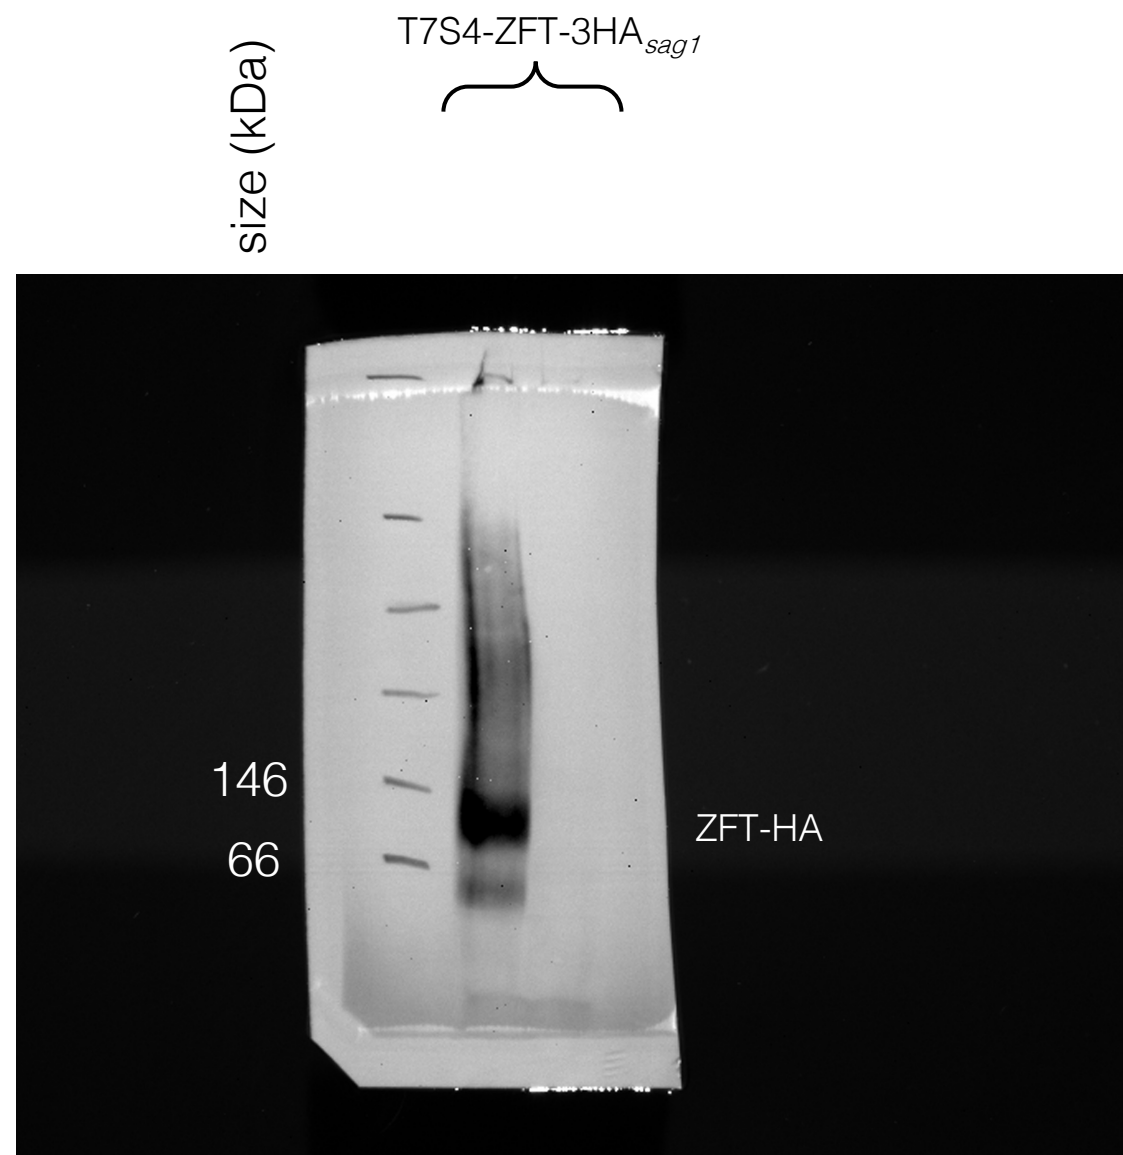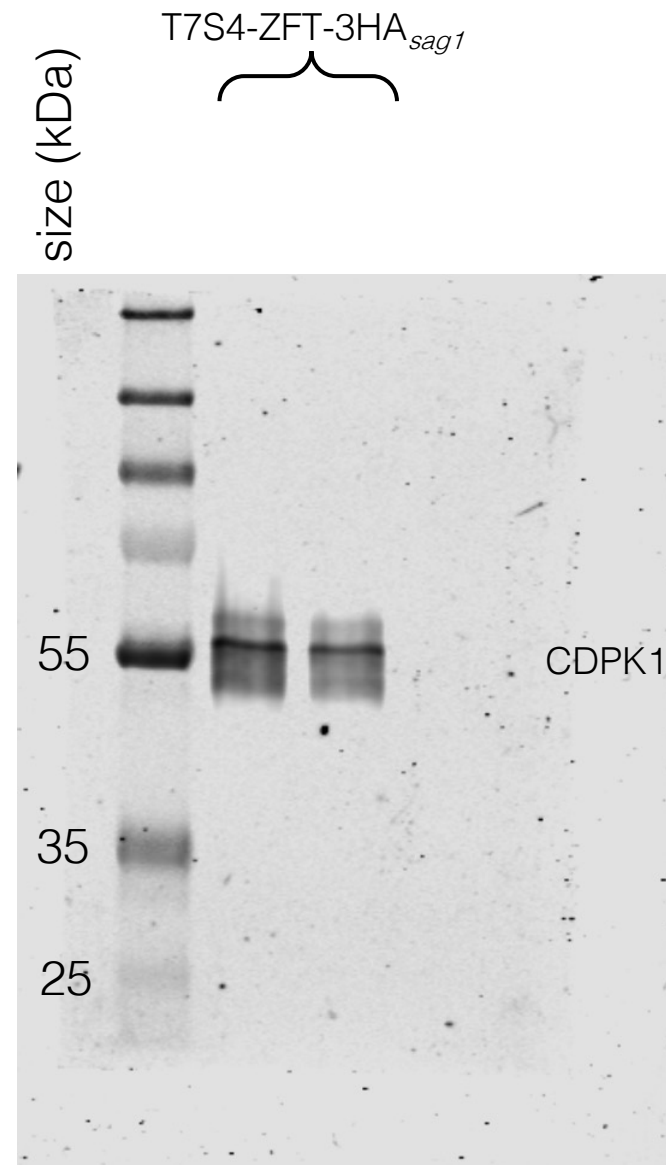

Figure S3, Source Data 1. Original membranes corresponding to Figure S3, panels C and E.

Supplement: fig3-figsupp1-data1 [file Figure S3_Source Data 1.pdf › Figure S3 - Source Data 1. PDF file containing original western blots for Figures S3C and S3E, indicating the relevant bands and conditions/Figure S3_Source Data 1.pdf]

4B

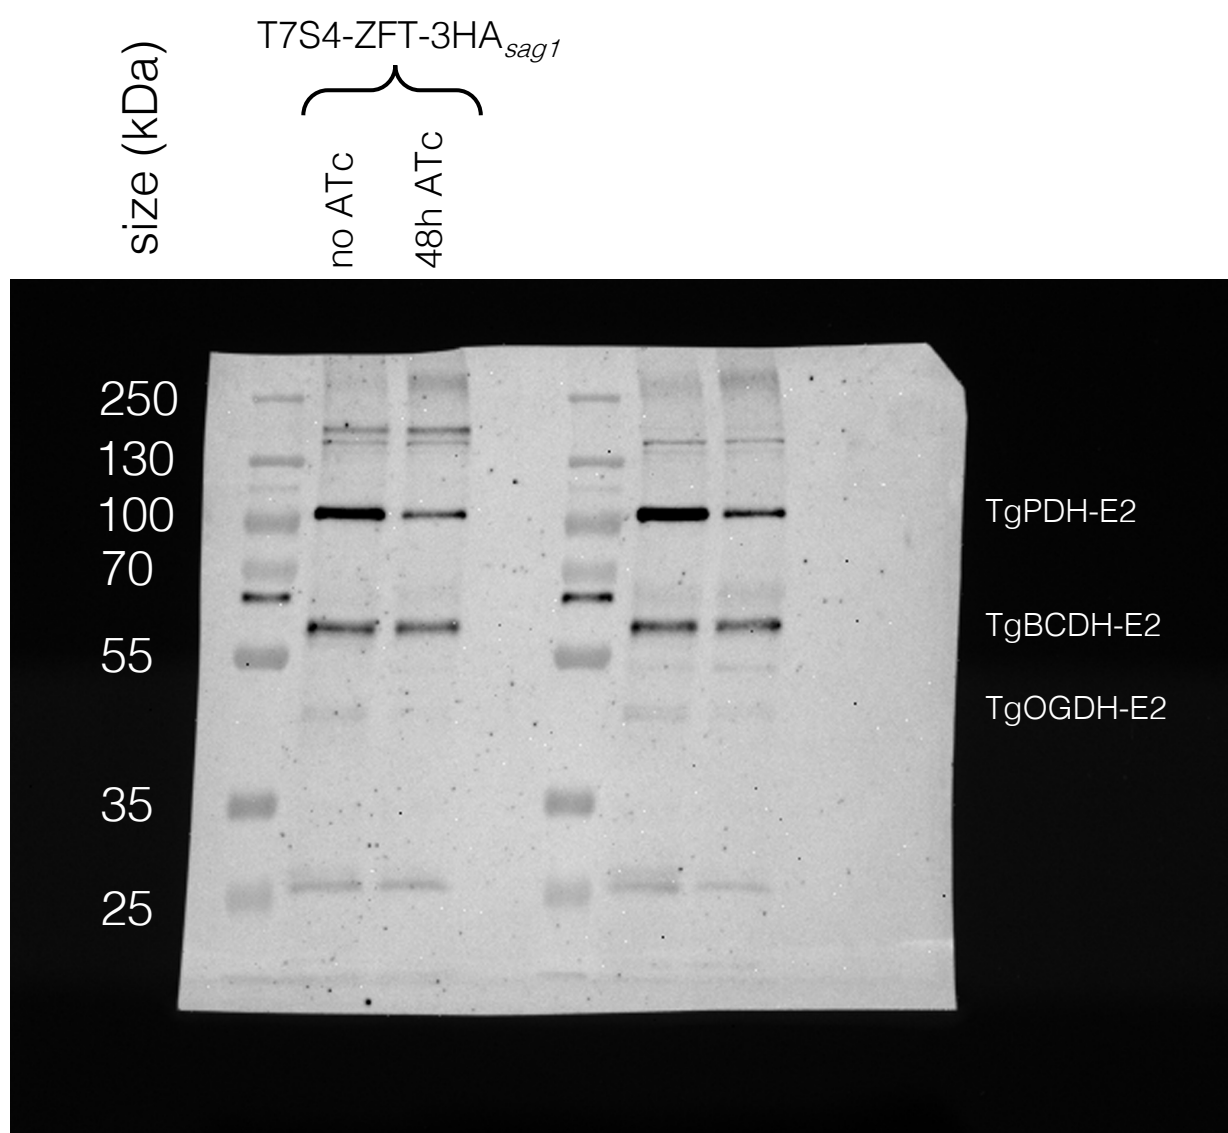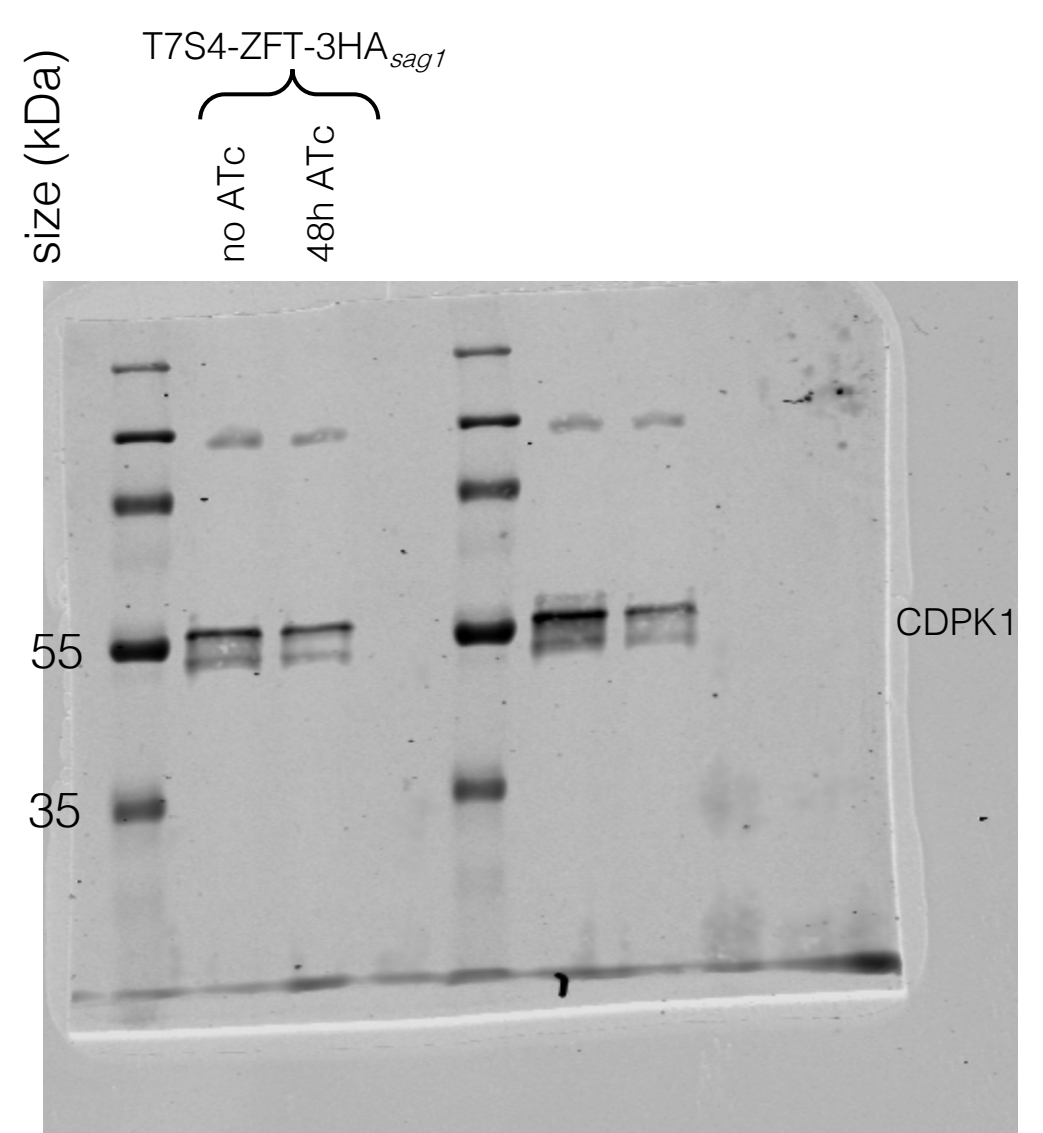

4K

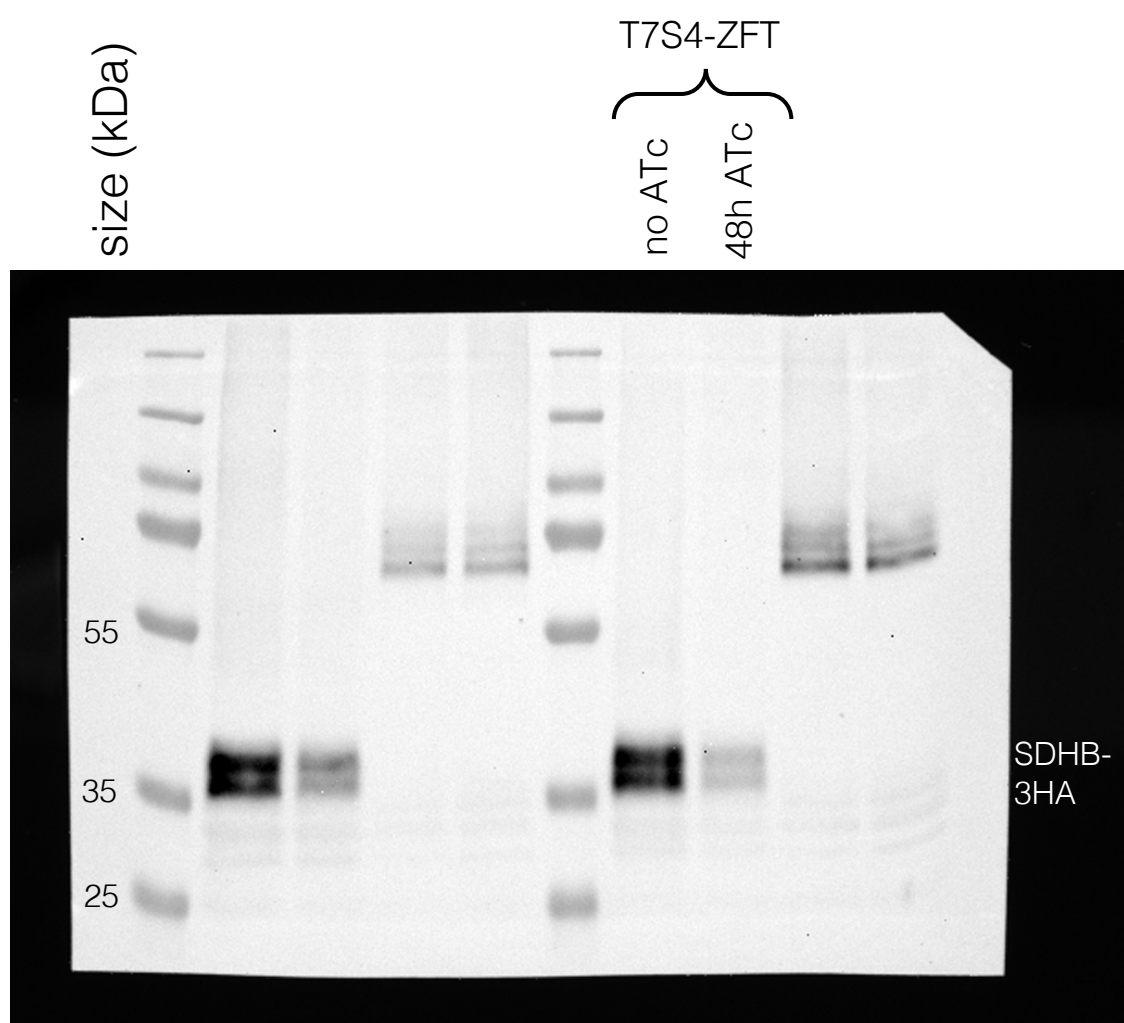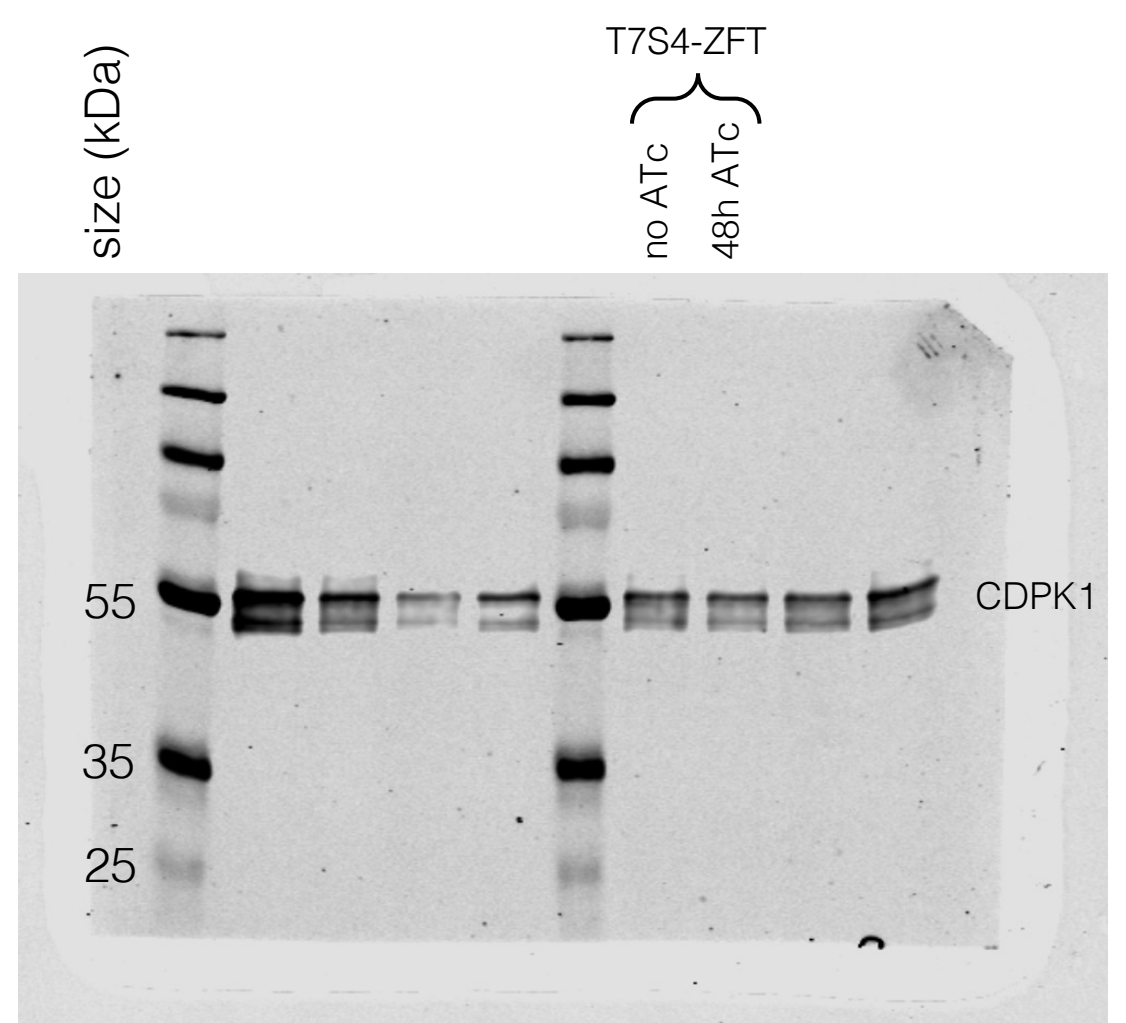

4M

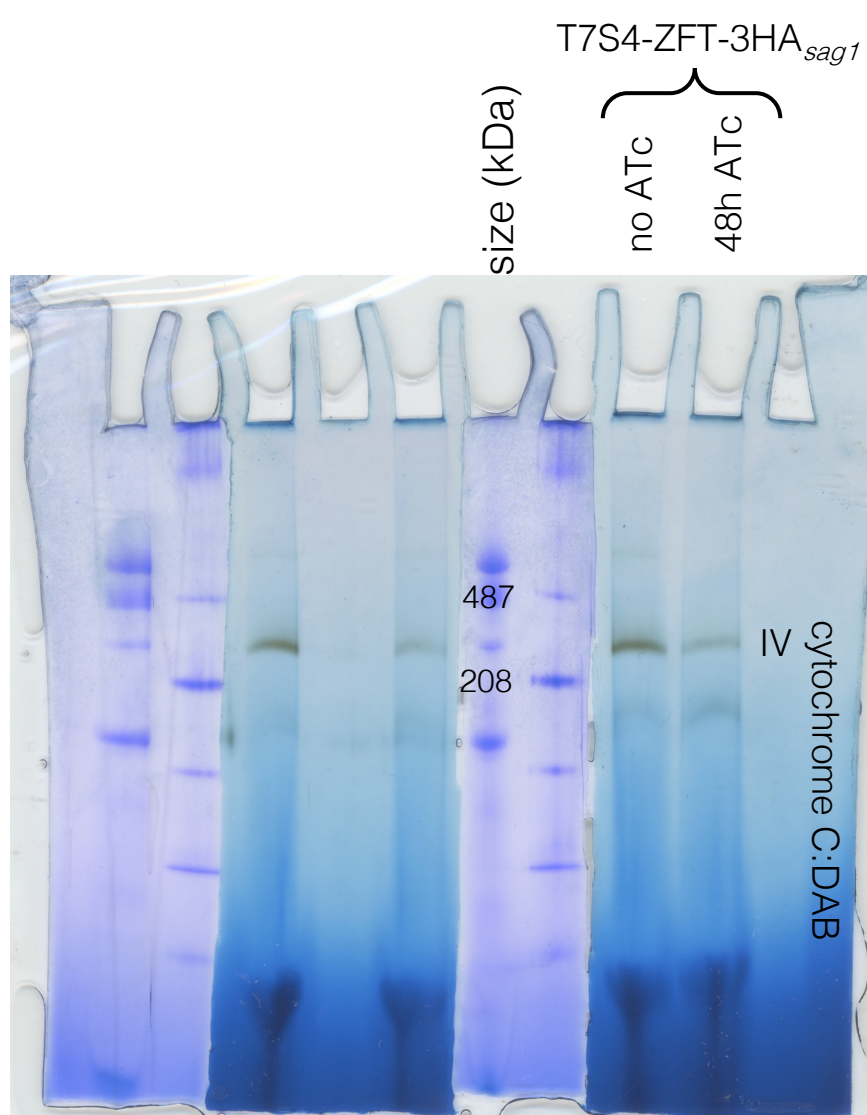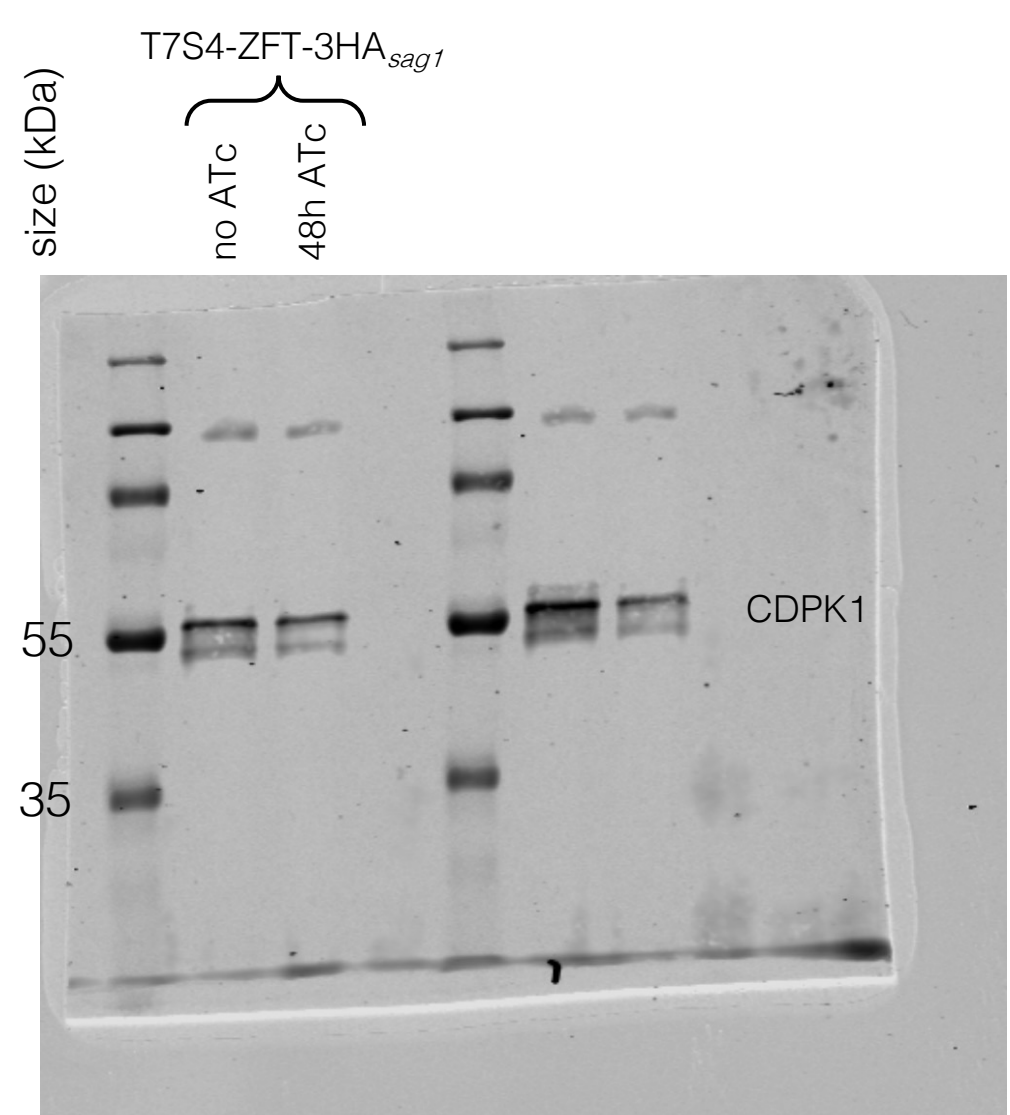

Figure 4, Source Data 1. Original membranes corresponding to Figure 4, panels B, K and M.

Supplement: fig4-data1 [file Figure 4_Source Data 1.pdf › Figure 4 - Source Data 1. PDF file containing original western blots for Figures 4B, 4K and 4M indicating the relevant bands and conditions/Figure 4_Source Data 1.pdf]

S4A

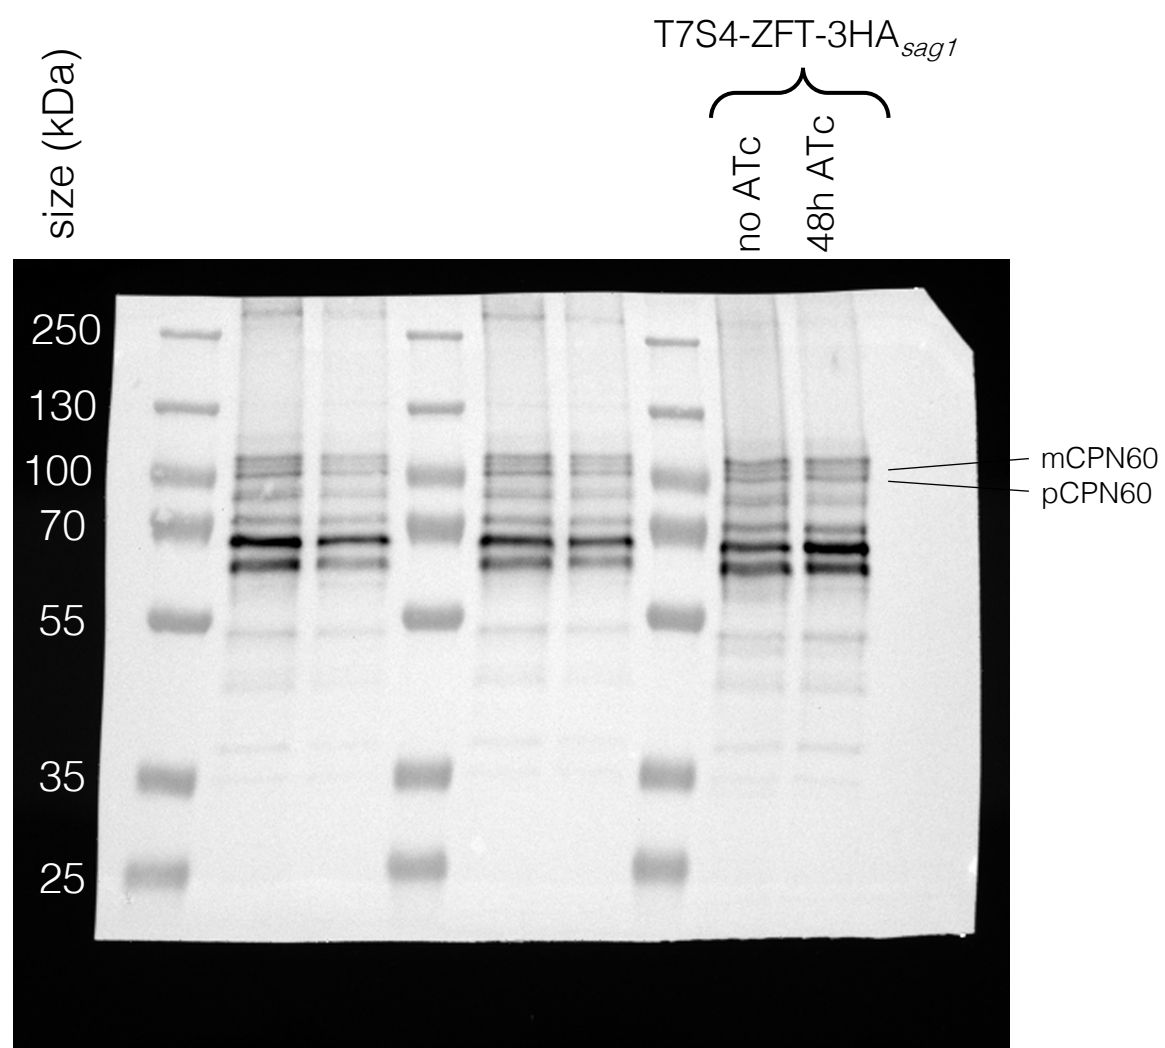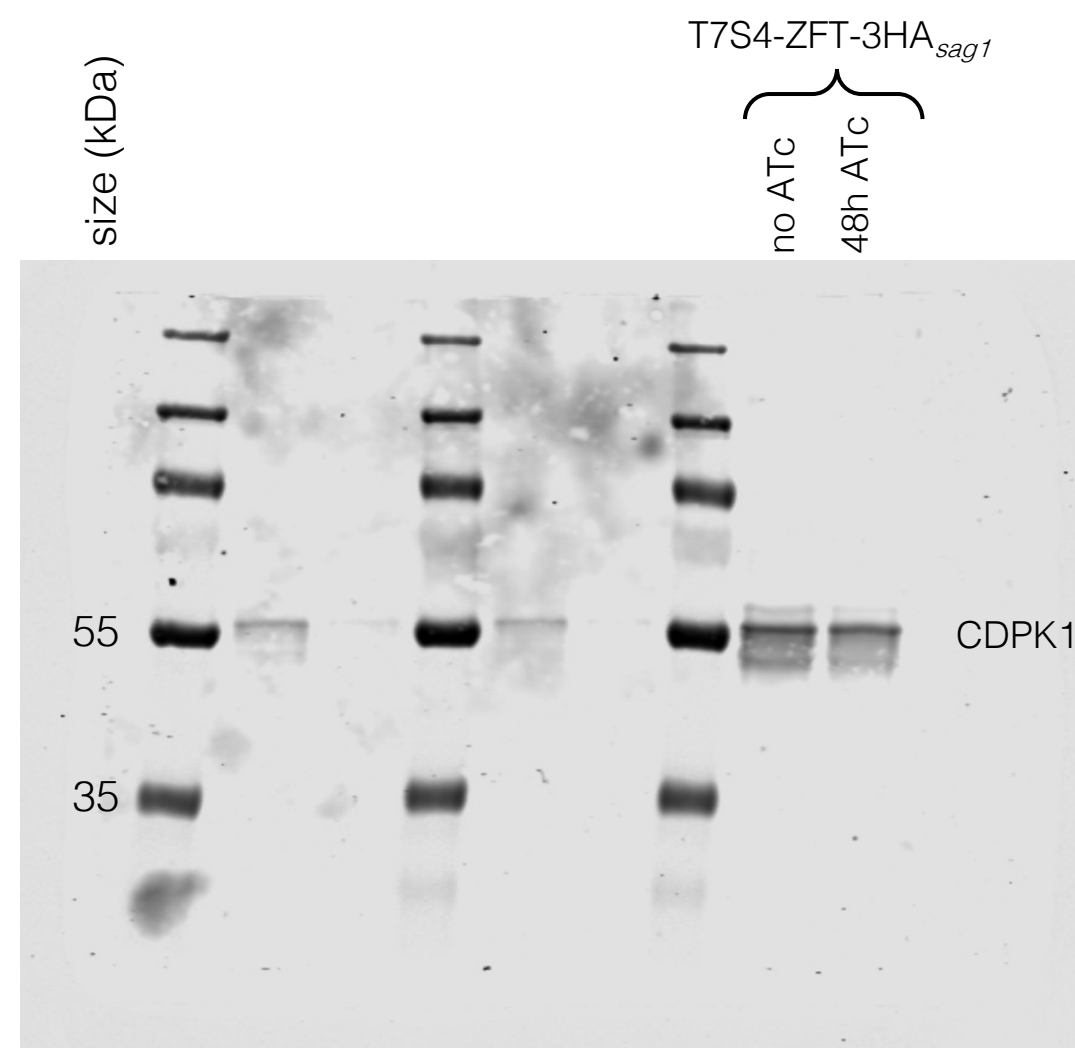

S4J

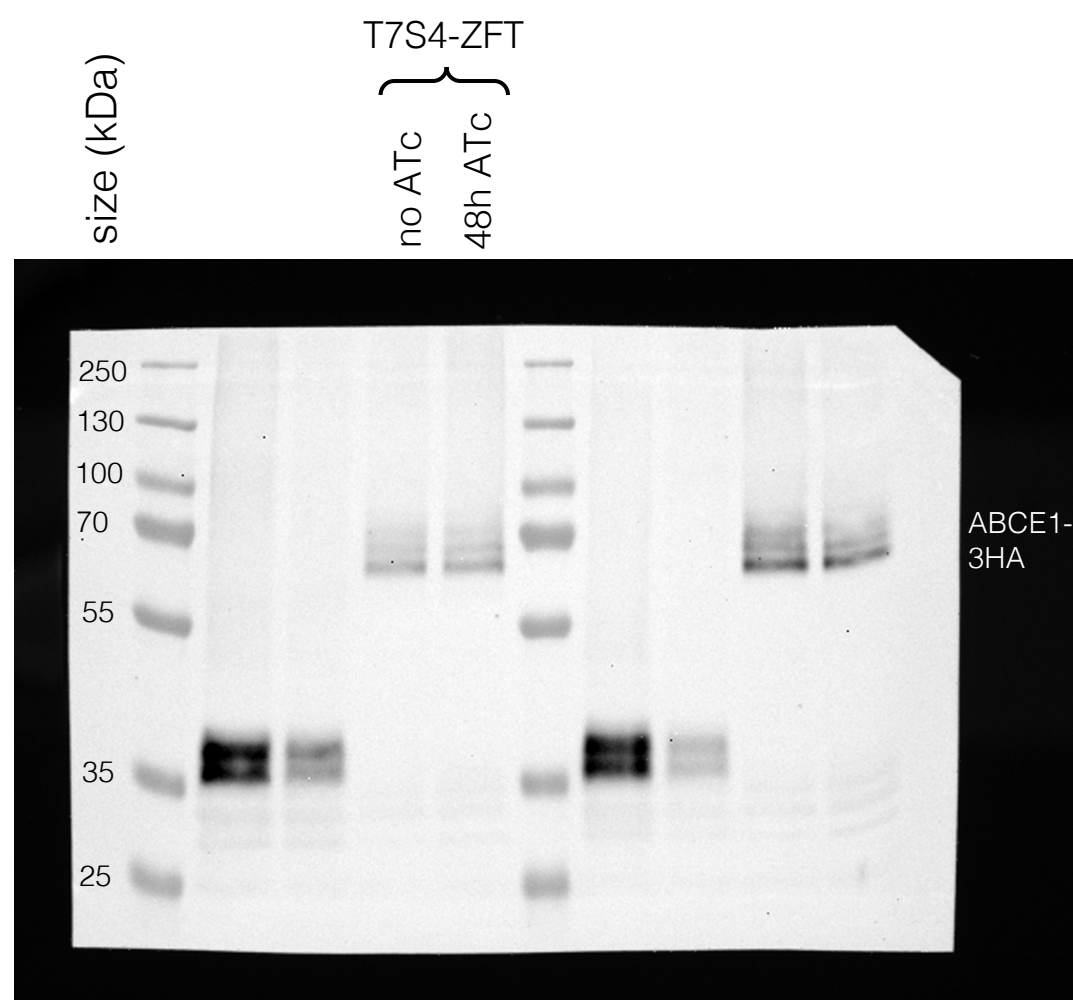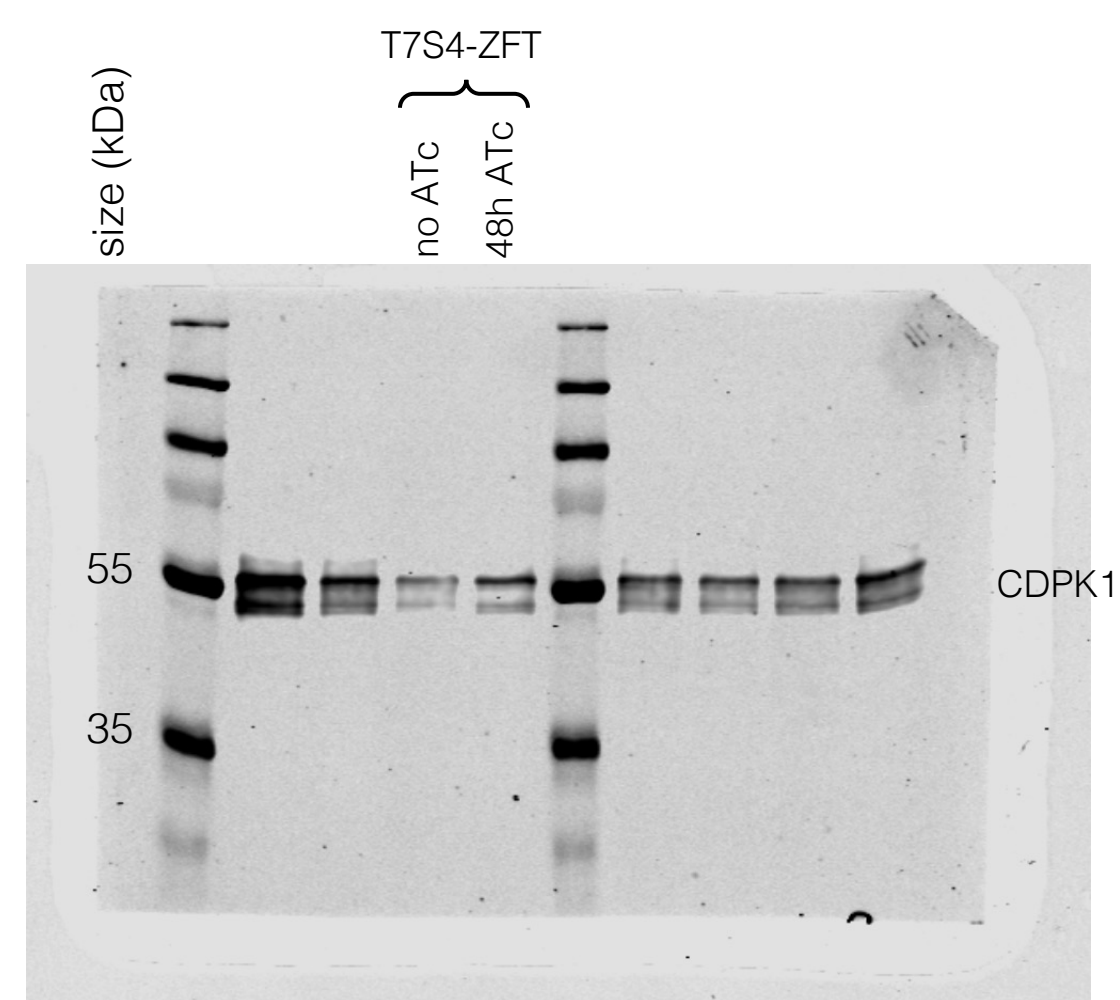

Figure S4, Source Data 1. Original membranes corresponding to Figure S4, panels A and J.

Supplement: fig4-figsupp1-data1 [file Figure S4_Source Data 1.pdf › Figure S4 - Source Data 1. PDF file containing original western blots for Figures S4A and S4J, indicating the relevant bands and conditions/Figure S4_Source Data 1.pdf]

6F

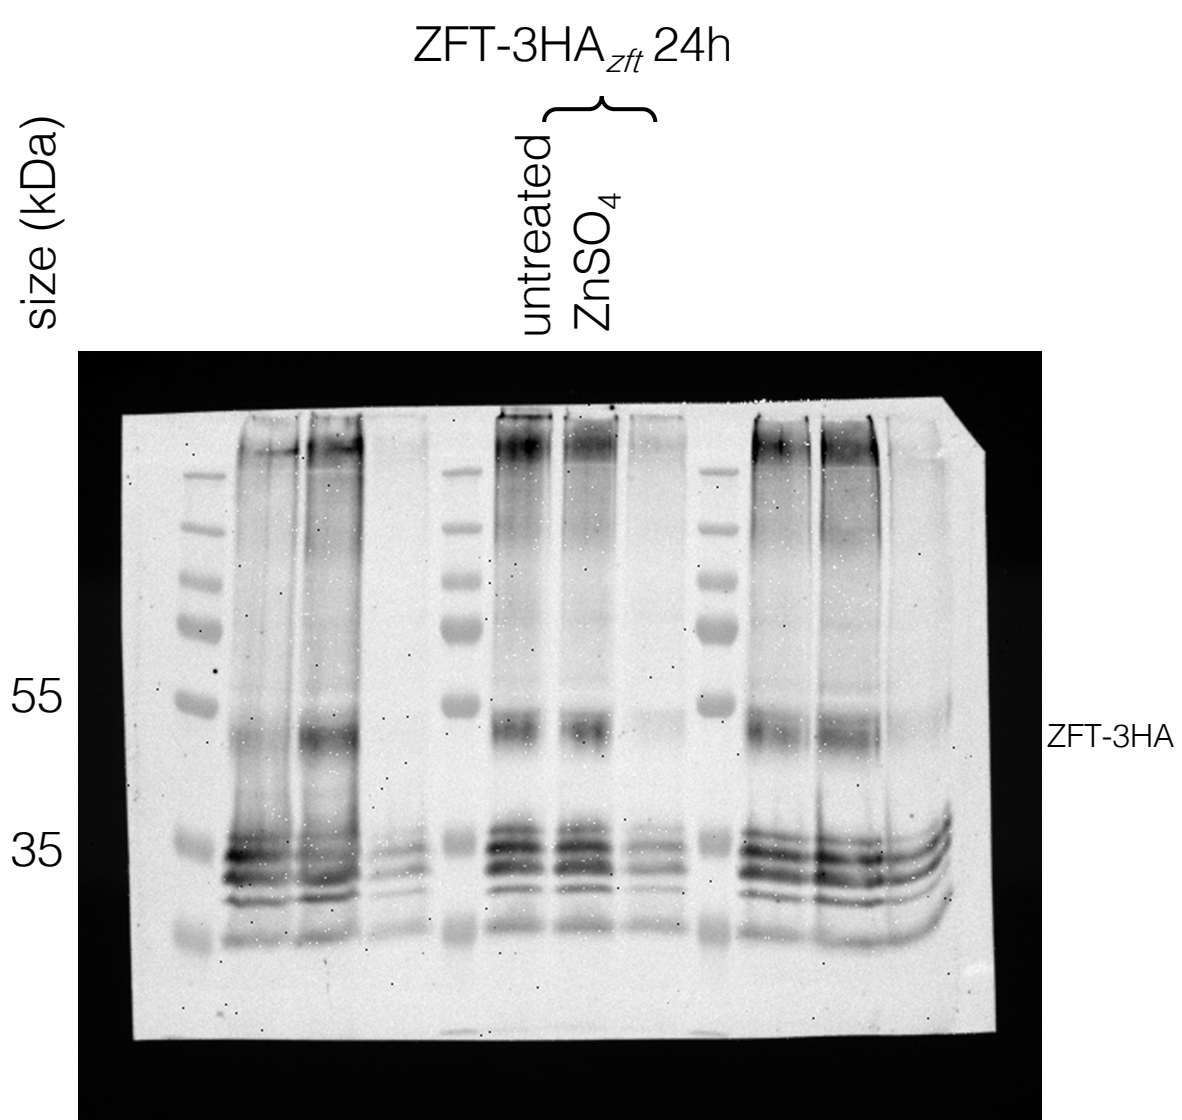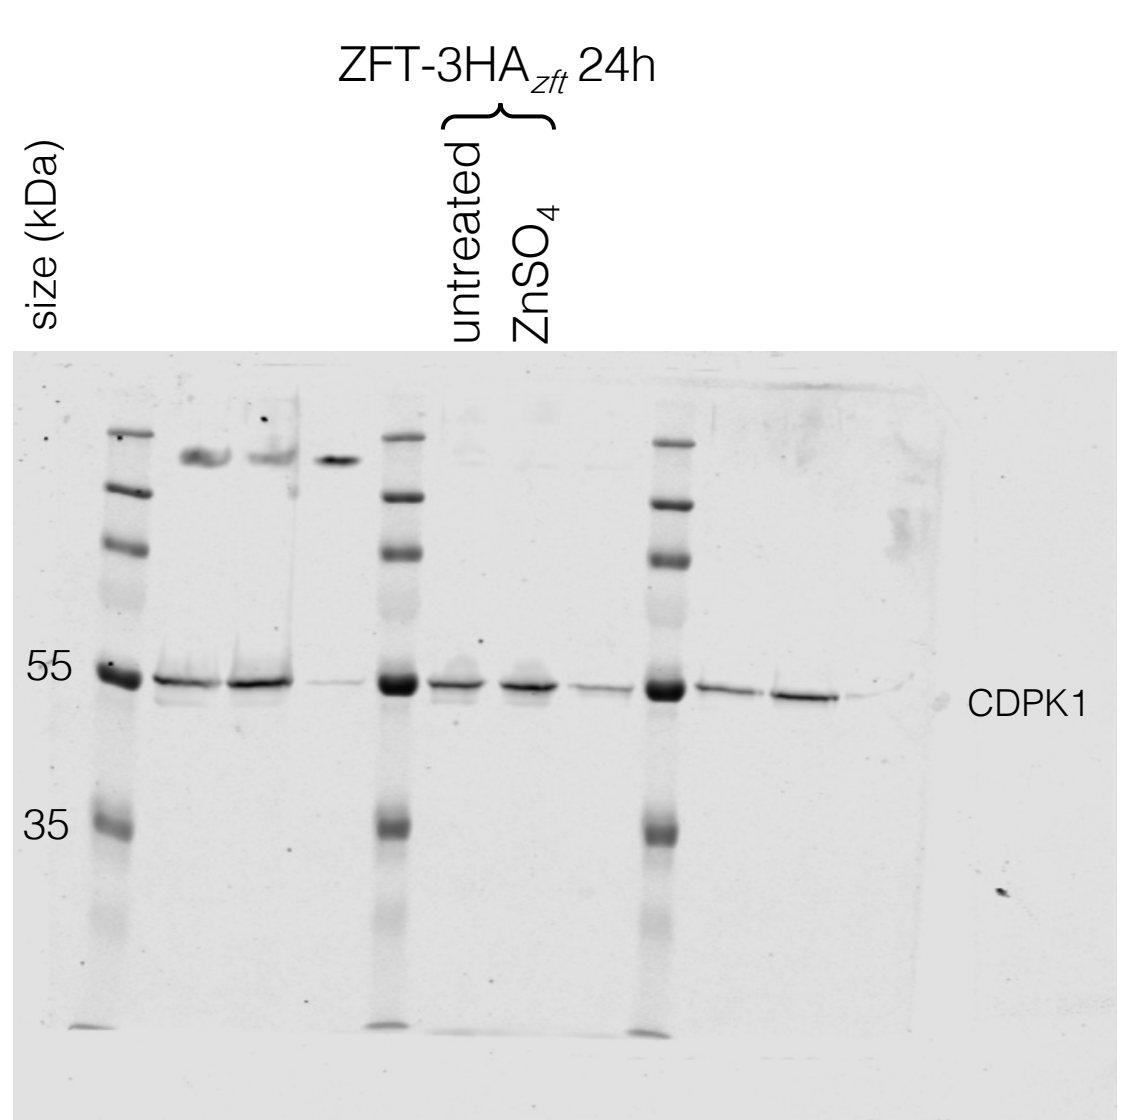

6H

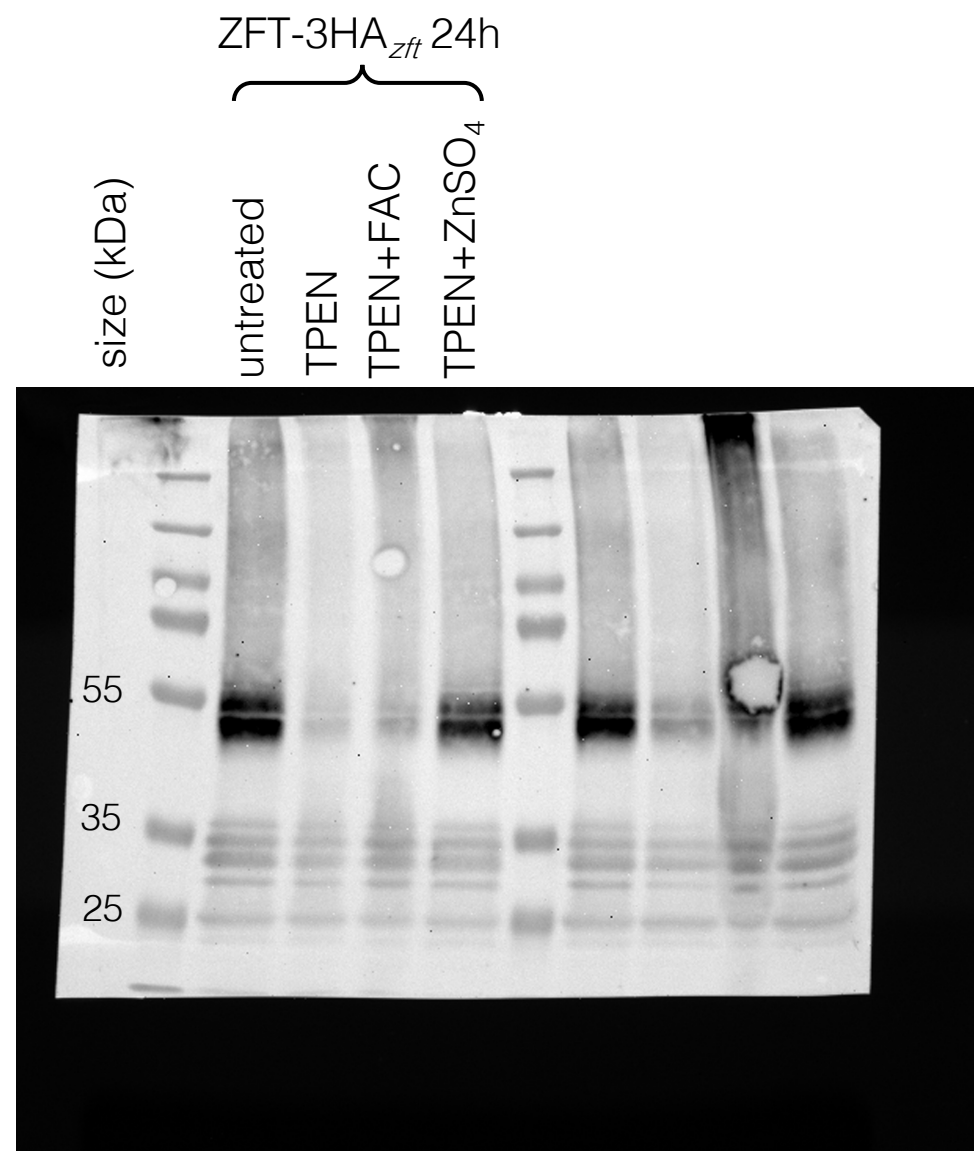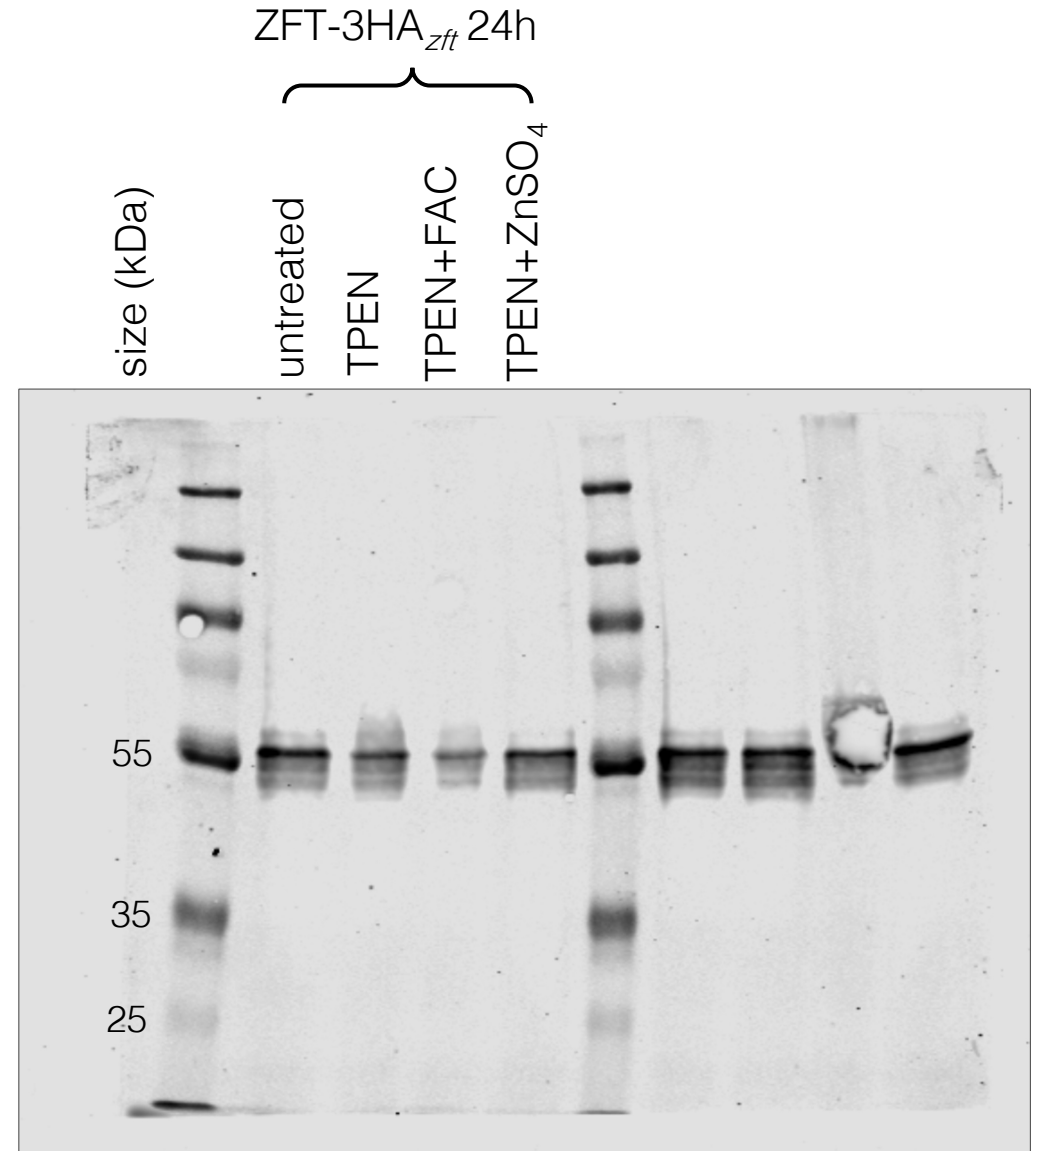

Figure 6, Source Data 1. Original membranes corresponding to Figure 6, panels F and H.

Supplement: fig6-data1 [file Figure 6_Source Data 1.pdf › Figure 6 - Source Data 1. PDF file containing original western blots for Figures 6F and 6H, indicating the relevant bands and conditions/Figure 6_Source Data 1.pdf]
